# Supplementary material for: Mitochondrial Haplotypes Associated with Biomarkers for Alzheimer’s Disease
Source: PLoS One. 2013 Sep 11;8(9):e74158. doi: 10.1371/journal.pone.0074158 (PMC3770576; doi:10.1371/journal.pone.0074158)
Supplement: Table S2 — Pairwise correlation coefficients. Here we report pairwise correlation coefficients for each of the tested phenotypes, and corresponding p-values. Cells highlighted yellow are significant correlations. While there are many significant correlations, most are very small in magnitude. (XLSX) [file pone.0074158.s006.xlsx]

## Sheet: Sheet1
		Whole Brain Volume (Baseline)	Left Hippocampal Volume (Baseline)	Right Hippocampal Volume (Baseline)	Annualized Whole Brain Volume Atrophy	Annualized Left Hippocampal Volume Atrophy	Annualized Right Hippocampal Volume Atrophy	Average HOC (Baseline)	% Change HOC	Parahippocampal Cortex Thickness (Baseline)	% Change Parahippocampal Cortex Thickness	Temporal Pole Thickness (Baseline)	% Change Temporal Pole Thickness	Entorhinal Cortex Thickness (Baseline)	% Change Entorhinal cortex	ADAS Cog Total 11 Score Baseline	% Change in ADAS Cog Total 11 Score
Whole Brain Volume (Baseline)	Correlation	N/A
	p-value
Left Hippocampal Volume (Baseline)	Correlation	-0.232	N/A
	p-value	0
Right Hippocampal Volume (Baseline)	Correlation	-0.177	0.785	N/A
	p-value	0.002	0
Annualized Whole Brain Volume Atrophy	Correlation	0.058	0.011	0.045	N/A
	p-value	0.325	0.849	0.439
Annualized Left Hippocampal Volume Atrophy	Correlation	0.01	0.328	0.305	-0.057	N/A
	p-value	0.865	0	0	0.327
Annualized Right Hippocampal Volume Atrophy	Correlation	-0.041	0.246	0.276	-0.041	0.551	N/A
	p-value	0.486	0	0	0.482	0
Average HOC (Baseline)	Correlation	0.1	0.413	0.484	0.207	0.264	0.208	N/A
	p-value	0.089	0	0	0	0	0
% Change HOC	Correlation	0.074	0.251	0.284	0.548	0.278	0.268	0.569	N/A
	p-value	0.205	0	0	0	0	0	0
Parahippocampal Cortex Thickness (Baseline)	Correlation	0.066	0.19	0.189	0.074	0.089	0.026	0.262	0.172	N/A
	p-value	0.259	0.001	0.001	0.209	0.131	0.656	0	0.003
% Change Parahippocampal Cortex Thickness	Correlation	0.073	0.064	0.12	0.44	0.115	0.087	0.212	0.526	0.043	N/A
	p-value	0.214	0.275	0.04	0	0.05	0.138	0	0	0.467
Temporal Pole Thickness (Baseline)	Correlation	0.195	0.195	0.243	0.028	0.119	0.029	0.45	0.275	0.358	0.119	N/A
	p-value	0.001	0.001	0	0.63	0.042	0.623	0	0	0	0.042
% Change Temporal Pole Thickness	Correlation	0.123	0.068	0.071	0.409	0.057	0.052	0.273	0.477	0.033	0.378	0.144	N/A
	p-value	0.035	0.246	0.225	0	0.329	0.372	0	0	0.568	0	0.014
Entorhinal Cortex Thickness (Baseline)	Correlation	0.18	0.328	0.403	0.099	0.212	0.132	0.558	0.367	0.299	0.179	0.722	0.214	N/A
	p-value	0.002	0	0	0.092	0	0.024	0	0	0	0.002	0	0
% Change Entorhinal cortex	Correlation	0.164	0.032	0.01	0.429	0.102	0.143	0.198	0.493	0.01	0.448	0.131	0.545	0.124	N/A
	p-value	0.005	0.586	0.862	0	0.083	0.014	0.001	0	0.86	0	0.025	0	0.034
ADAS Cog Total 11 Score Baseline	Correlation	0.029	-0.117	-0.109	0.021	-0.039	-0.07	-0.132	-0.071	-0.089	0.025	-0.084	0.061	-0.097	0.038	N/A
	p-value	0.616	0.046	0.063	0.715	0.502	0.235	0.024	0.223	0.128	0.673	0.154	0.3	0.097	0.513
% Change in ADAS Cog Total 11 Score	Correlation	-0.021	0.069	0.06	-0.155	-0.044	-0.124	-0.093	-0.202	0.002	-0.124	-0.103	-0.155	-0.097	-0.142	0	N/A
	p-value	0.716	0.236	0.306	0.008	0.455	0.034	0.114	0.001	0.977	0.034	0.079	0.008	0.099	0.015	0.997
