# Supplementary material for: Mitochondrial Haplotypes Associated with Biomarkers for Alzheimer’s Disease
Source: PLoS One. 2013 Sep 11;8(9):e74158. doi: 10.1371/journal.pone.0074158 (PMC3770576; doi:10.1371/journal.pone.0074158)
Supplement: Table S3 — Single SNP association tests. Analysis of covariance (ANCOVA) was performed in SAS to identify possible variant association to the phenotypes of interest. Covariants in the analysis were: age, gender, number of APOE alleles, and the SNP of interest. A significance threshold for 138 mitochondrial variants is an alpha of 0.0003. The regression sum of squares statistic was calculated for each mitochondrial variant. No significant SNPs asociations were identified. In each of the tabs, the SNP position listed is the array SNP position. The last tab, “Position Mappings”, has a key to translate the array position to NC_012920. (XLSX) [file pone.0074158.s007.xlsx]

## Sheet: Whole Brain Volume
Variant	p-value
MitoT12706C	0.0007
MitoA15302G	0.0031
MitoC9541T	0.0081
MitoC10874T	0.0088
MitoC2485T	0.0126
MitoC12670T	0.0206
MitoA13264G	0.0241
MitoA15759G	0.0279
MitoG228A	0.0315
MitoA3481G	0.038
MitoT2160C	0.0479
MitoT6222C	0.0511
MitoT11486C	0.0569
MitoA4918G	0.057
MitoT3395C	0.0609
MitoT9717C	0.0621
MitoG8617T	0.0627
MitoT15785C	0.0668
MitoA13106G	0.068
MitoA5391G	0.0687
MitoC6046T	0.0687
MitoG5047A	0.0789
MitoA5657G	0.079
MitoG10311A	0.0792
MitoG3667A	0.0915
MitoC2791T	0.1012
MitoG12851A	0.1048
MitoA8870G	0.1177
MitoA16164G	0.1186
MitoG12373A	0.1188
MitoA3721G	0.12
MitoG10399A	0.1365
MitoA10551G	0.1367
MitoT5005C	0.1388
MitoT6681C	0.1463
MitoC16329T	0.1464
MitoA9073G	0.1576
MitoG11915A	0.1643
MitoA16163G	0.1671
MitoT3198C	0.1682
MitoT4562C	0.1834
MitoT6777C	0.1838
MitoC5264T	0.1856
MitoA5952G	0.1868
MitoG12631A	0.2024
MitoT7176C	0.2117
MitoG10587A	0.2148
MitoA14234G	0.2166
MitoG10590A	0.2173
MitoG1721A	0.2391
MitoC3971T	0.2484
MitoT9699C	0.2497
MitoC15905T	0.2761
MitoC3993T	0.2837
MitoG9378A	0.2877
MitoA13781G	0.2911
MitoT14799C	0.3065
MitoT9951C	0.3198
MitoT10322C	0.3217
MitoA3349G	0.3388
MitoA12309G	0.3457
MitoA11468G	0.3614
MitoA4825G	0.3629
MitoA6753G	0.3676
MitoT14179C	0.3715
MitoG3012A	0.3745
MitoA14583G	0.3792
MitoG4770A	0.3801
MitoT217C	0.3936
MitoA9668G	0.3966
MitoC7275T	0.3971
MitoT13790C	0.3992
MitoT1191C	0.4015
MitoT9900C	0.4036
MitoC16149T	0.4037
MitoT10464C	0.404
MitoC3595T	0.4082
MitoT10239C	0.4087
MitoC4884T	0.4103
MitoG4821A	0.4156
MitoG16146A	0.4161
MitoT4337C	0.4177
MitoG2708A	0.4331
MitoG247A	0.4339
MitoA15245G	0.4485
MitoT10035C	0.4815
MitoG5774A	0.4964
MitoT479C	0.5022
MitoT5496C	0.5036
MitoA11252G	0.5327
MitoT491C	0.5377
MitoG15931A	0.5405
MitoG15258A	0.543
MitoG15044A	0.568
MitoT8278C	0.5708
MitoT11900C	0.5845
MitoT13966C	0.5902
MitoA4025G	0.5943
MitoC16184A	0.6031
MitoG6735A	0.6054
MitoT2887C	0.6059
MitoT6153C	0.6125
MitoC1050T	0.6139
MitoG16393A	0.6224
MitoG3916A	0.6467
MitoG1440A	0.6475
MitoA1738G	0.6576
MitoC458T	0.6783
MitoG16130A	0.6842
MitoG6261A	0.6848
MitoA7769G	0.6945
MitoC295T	0.7051
MitoT15671C	0.7548
MitoT4978C	0.7556
MitoG7522A	0.761
MitoA9094G	0.7628
MitoA15925G	0.7716
MitoA7056G	0.7721
MitoT16145C	0.7741
MitoG15929A	0.775
MitoG752A	0.7834
MitoG11378A	0.7976
MitoC464T	0.8285
MitoG5461A	0.8397
MitoT10916C	0.846
MitoA829G	0.864
MitoG10689A	0.8749
MitoC8656T	0.8755
MitoG8270A	0.8913
MitoG6027A	0.9055
MitoG3919A	0.9064
MitoA10045G	0.9095
MitoT5443C	0.912
MitoC16272T	0.9229
MitoC13651T	0.9401
MitoC15834T	0.9542
MitoG16392A	0.9566
MitoC15536T	0.96

## Sheet: Left Hippocampal Atrophy
Variant	p-value
MitoA5657G	0.0167
MitoG5047A	0.0382
MitoA13781G	0.048
MitoG1440A	0.0524
MitoG5774A	0.0531
MitoG10311A	0.0885
MitoA10045G	0.0951
MitoA7769G	0.0955
MitoA13106G	0.1081
MitoC3971T	0.1225
MitoG247A	0.1477
MitoG752A	0.1529
MitoT10035C	0.1661
MitoG228A	0.1809
MitoT10239C	0.2008
MitoC16272T	0.2314
MitoG12851A	0.2315
MitoC10874T	0.241
MitoT11900C	0.2479
MitoT3198C	0.248
MitoT2887C	0.2483
MitoA7056G	0.2508
MitoC458T	0.2565
MitoT13790C	0.2596
MitoT3395C	0.2837
MitoA11252G	0.2978
MitoA9073G	0.298
MitoG10587A	0.298
MitoT14179C	0.298
MitoC13651T	0.2989
MitoC9541T	0.3073
MitoG16393A	0.312
MitoC295T	0.3149
MitoT4978C	0.3194
MitoG3012A	0.3212
MitoG4770A	0.3297
MitoT6222C	0.3375
MitoG15044A	0.3377
MitoC464T	0.3446
MitoG16392A	0.3447
MitoA829G	0.3754
MitoG5461A	0.3927
MitoT4337C	0.3945
MitoG6735A	0.3958
MitoG8617T	0.4091
MitoA4825G	0.4203
MitoG12631A	0.4213
MitoA13264G	0.4389
MitoT7176C	0.451
MitoT6777C	0.4576
MitoA14234G	0.4636
MitoA10551G	0.4644
MitoC16184A	0.4728
MitoT5443C	0.4748
MitoC7275T	0.4755
MitoC8656T	0.4804
MitoT491C	0.488
MitoT9717C	0.4899
MitoG9378A	0.5017
MitoT9900C	0.5024
MitoT10322C	0.5101
MitoG10689A	0.5132
MitoA5952G	0.5159
MitoC3993T	0.5285
MitoT14799C	0.5339
MitoG15258A	0.5363
MitoT5496C	0.5399
MitoG8270A	0.5486
MitoT13966C	0.5499
MitoG16130A	0.5553
MitoA9668G	0.5583
MitoT16145C	0.563
MitoA6753G	0.5696
MitoG3916A	0.5799
MitoT217C	0.5829
MitoC1050T	0.5856
MitoG1721A	0.586
MitoT479C	0.607
MitoA3481G	0.6191
MitoT2160C	0.6206
MitoG12373A	0.6399
MitoT10916C	0.6515
MitoT9699C	0.6553
MitoT5005C	0.656
MitoA4918G	0.6636
MitoG4821A	0.6642
MitoG10590A	0.6984
MitoC4884T	0.7055
MitoA1738G	0.7086
MitoG11378A	0.7104
MitoG6261A	0.7151
MitoA15925G	0.7209
MitoT12706C	0.7225
MitoT4562C	0.7243
MitoC16329T	0.7286
MitoC16149T	0.7309
MitoC2485T	0.7451
MitoA12309G	0.7475
MitoT6681C	0.7489
MitoA9094G	0.7536
MitoT8278C	0.7844
MitoT10464C	0.7882
MitoC3595T	0.7989
MitoG3667A	0.8007
MitoG15929A	0.8302
MitoC2791T	0.8354
MitoG11915A	0.8434
MitoT1191C	0.8627
MitoA4025G	0.8748
MitoG7522A	0.8748
MitoT15671C	0.8769
MitoA14583G	0.8896
MitoA11468G	0.8953
MitoC15834T	0.9046
MitoC15536T	0.9073
MitoG16146A	0.9091
MitoC15905T	0.9137
MitoA3721G	0.9166
MitoA5391G	0.9166
MitoC6046T	0.9166
MitoG2708A	0.9298
MitoA16164G	0.9452
MitoA15759G	0.946
MitoG6027A	0.9504
MitoT6153C	0.9565
MitoT11486C	0.9679
MitoA15302G	0.9714
MitoT15785C	0.9714
MitoA16163G	0.9789
MitoG3919A	0.9826
MitoG10399A	0.9831
MitoT9951C	0.9929
MitoA15245G
MitoA3349G
MitoA8870G
MitoC12670T
MitoC5264T
MitoG15931A

## Sheet: % Change Temporal Pole Thick
Variant	p-value
MitoT6777C	0.0082
MitoC15905T	0.0128
MitoA5657G	0.0146
MitoC458T	0.0289
MitoA11468G	0.0418
MitoT10464C	0.0628
MitoG10399A	0.0711
MitoG16393A	0.0839
MitoG11915A	0.0934
MitoG10311A	0.0965
MitoG247A	0.1036
MitoA1738G	0.1111
MitoG15929A	0.1143
MitoT5496C	0.1246
MitoA7769G	0.1285
MitoC2485T	0.1492
MitoG5774A	0.1509
MitoG1721A	0.1546
MitoA13781G	0.1557
MitoA13264G	0.1565
MitoA14234G	0.161
MitoA4825G	0.1638
MitoT10239C	0.1706
MitoA15925G	0.1913
MitoT9699C	0.1999
MitoG15044A	0.2225
MitoT10035C	0.2299
MitoA15759G	0.232
MitoG8270A	0.2426
MitoT14799C	0.2437
MitoG16392A	0.2514
MitoT6222C	0.2527
MitoA4918G	0.2683
MitoT2887C	0.2967
MitoA3481G	0.3231
MitoT6681C	0.3304
MitoG3012A	0.3325
MitoT14179C	0.3397
MitoG5047A	0.3461
MitoA10551G	0.3694
MitoC295T	0.3732
MitoT4978C	0.3756
MitoC16184A	0.3772
MitoA15245G	0.3814
MitoA829G	0.3829
MitoA16164G	0.3847
MitoC16272T	0.3958
MitoG7522A	0.4038
MitoC464T	0.4209
MitoT491C	0.421
MitoC8656T	0.4271
MitoT6153C	0.4305
MitoT4337C	0.4328
MitoC2791T	0.4387
MitoT217C	0.4596
MitoA16163G	0.4693
MitoT16145C	0.4986
MitoT1191C	0.5024
MitoA8870G	0.5143
MitoG12373A	0.5289
MitoG5461A	0.5356
MitoG4821A	0.5451
MitoC15834T	0.5462
MitoT3395C	0.5465
MitoG6027A	0.5519
MitoT11486C	0.5528
MitoT2160C	0.5546
MitoG10590A	0.5638
MitoG228A	0.5717
MitoA9073G	0.5745
MitoT13790C	0.5771
MitoA9668G	0.5781
MitoG10689A	0.5805
MitoC15536T	0.5851
MitoG3667A	0.5872
MitoA12309G	0.5932
MitoG6735A	0.5948
MitoA5952G	0.61
MitoG10587A	0.6109
MitoG2708A	0.6112
MitoT4562C	0.6183
MitoG16130A	0.6239
MitoT10322C	0.6337
MitoC3595T	0.6358
MitoT10916C	0.6379
MitoT12706C	0.6435
MitoC1050T	0.6496
MitoC12670T	0.6602
MitoG6261A	0.6672
MitoC16149T	0.6678
MitoC13651T	0.6707
MitoT13966C	0.6761
MitoT11900C	0.6766
MitoA15302G	0.6808
MitoA5391G	0.691
MitoC6046T	0.691
MitoT9717C	0.6955
MitoA4025G	0.7213
MitoC3971T	0.7348
MitoA13106G	0.7396
MitoG12851A	0.7536
MitoT9951C	0.7548
MitoA3721G	0.7582
MitoA3349G	0.7769
MitoT479C	0.7808
MitoT5005C	0.783
MitoA6753G	0.7876
MitoC7275T	0.7906
MitoT15671C	0.792
MitoA9094G	0.7979
MitoA7056G	0.7991
MitoC5264T	0.8084
MitoT8278C	0.8093
MitoA10045G	0.8254
MitoT5443C	0.8257
MitoG8617T	0.8303
MitoT9900C	0.8413
MitoC16329T	0.8421
MitoA14583G	0.8515
MitoG3916A	0.8575
MitoT15785C	0.8892
MitoG9378A	0.8924
MitoG3919A	0.8976
MitoC4884T	0.9067
MitoG12631A	0.9079
MitoT3198C	0.917
MitoC9541T	0.9178
MitoG16146A	0.9346
MitoG1440A	0.9416
MitoG752A	0.949
MitoG15258A	0.9498
MitoG11378A	0.9577
MitoC3993T	0.961
MitoG4770A	0.9662
MitoA11252G	0.9761
MitoT7176C	0.9765
MitoC10874T	0.9772
MitoG15931A

## Sheet: Position Mappings
Array Position	NC_012920 position
MitoT217C	217
MitoG228A	228
MitoG247A	247
MitoC295T	295
MitoC458T	456
MitoC464T	462
MitoT479C	477
MitoT491C	489
MitoG752A	750
MitoA829G	827
MitoC1050T	1048
MitoT1191C	1189
MitoG1440A	1438
MitoG1721A	1719
MitoA1738G	1736
MitoT2160C	2158
MitoC2485T	2483
MitoG2708A	2706
MitoC2791T	2789
MitoT2887C	2885
MitoG3012A	3010
MitoT3198C	3197
MitoA3349G	3348
MitoT3395C	3394
MitoA3481G	3480
MitoC3595T	3594
MitoG3667A	3666
MitoA3721G	3720
MitoG3916A	3915
MitoG3919A	3918
MitoC3971T	3970
MitoC3993T	3992
MitoA4025G	4024
MitoT4337C	4336
MitoT4562C	4561
MitoG4770A	4769
MitoG4821A	4820
MitoA4825G	4824
MitoC4884T	4883
MitoA4918G	4917
MitoT4978C	4977
MitoT5005C	5004
MitoG5047A	5046
MitoC5264T	5263
MitoA5391G	5390
MitoT5443C	5442
MitoG5461A	5460
MitoT5496C	5495
MitoA5657G	5656
MitoG5774A	5773
MitoA5952G	5951
MitoG6027A	6026
MitoC6046T	6045
MitoT6153C	6152
MitoT6222C	6221
MitoG6261A	6260
MitoT6681C	6680
MitoG6735A	6734
MitoA6753G	6752
MitoT6777C	6776
MitoA7056G	7055
MitoT7176C	7175
MitoC7275T	7274
MitoG7522A	7521
MitoA7769G	7768
MitoG8270A	8269
MitoT8278C	8277
MitoG8617T	8616
MitoC8656T	8655
MitoA8870G	8869
MitoA9073G	9072
MitoA9094G	9093
MitoG9378A	9377
MitoC9541T	9540
MitoA9668G	9667
MitoT9699C	9698
MitoT9717C	9716
MitoT9900C	9899
MitoT9951C	9950
MitoT10035C	10034
MitoA10045G	10044
MitoT10239C	10238
MitoG10311A	10310
MitoT10322C	10321
MitoG10399A	10398
MitoT10464C	10463
MitoA10551G	10550
MitoG10587A	10586
MitoG10590A	10589
MitoG10689A	10688
MitoC10874T	10873
MitoT10916C	10915
MitoA11252G	11251
MitoG11378A	11377
MitoA11468G	11467
MitoT11486C	11485
MitoT11900C	11899
MitoG11915A	11914
MitoA12309G	12308
MitoG12373A	12372
MitoG12631A	12630
MitoC12670T	12669
MitoT12706C	12705
MitoG12851A	12850
MitoA13106G	13105
MitoA13264G	13263
MitoC13651T	13650
MitoA13781G	13780
MitoT13790C	13789
MitoT13966C	13965
MitoT14179C	14178
MitoA14234G	14233
MitoA14583G	14582
MitoT14799C	14798
MitoG15044A	15043
MitoA15245G	15244
MitoG15258A	15257
MitoA15302G	15301
MitoC15536T	15535
MitoT15671C	15670
MitoA15759G	15758
MitoT15785C	15784
MitoC15834T	15833
MitoC15905T	15904
MitoA15925G	15924
MitoG15929A	15928
MitoG15931A	15930
MitoG16130A	16129
MitoT16145C	16144
MitoG16146A	16145
MitoC16149T	16148
MitoA16163G	16162
MitoA16164G	16163
MitoC16184A	16183
MitoC16272T	16270
MitoC16329T	16327
MitoG16392A	16390
MitoG16393A	16391
